# Supplementary material for: Core versus diet-associated and postprandial bacterial communities of the rainbow trout (Oncorhynchus mykiss) midgut and faeces
Source: PubMed Central journal article supplement (PMC6031335; doi:10.1242/bio.034397), 2018-05-18
Supplement: biolopen-7-034397-s1.pdf [file biolopen-7-034397-s1.pdf]

**Table S1:** Ingredient and chemical composition of experimental diets (A, B, D) in reared *Oncorhynchus mykiss*.

|                                                   | A        | B*      | D        |
|---------------------------------------------------|----------|---------|----------|
| <b>Ingredient composition (g kg<sup>-1</sup>)</b> |          |         |          |
| Marine protein / oil                              | 220 / 80 | 560/120 | 400/100  |
| Plant protein / oil                               | 560 / 20 | 310 / - | 340 / 60 |
| Wheat                                             | 110      |         | 90       |
| Vitamin & mineral premix                          | 10       | 10      | 10       |
| ratio: (marine protein / marine oil)              | 2.7      | 4.7     | 4.0      |
| ratio: (plant protein / plant oil)                | 28.0     | -       | 56.7     |
| <b>Chemical composition (%)</b>                   |          |         |          |
| Crude protein                                     | 45       | 44      | 45       |
| Total lipid                                       | 22       | 23      | 21       |
| Ash                                               | 7.1      | 10      | 8        |
| GE (kJ.kg <sup>-1</sup> DM)                       | 21.5     | 21.5    | 21.7     |

\* **Mente, E., Pierce, G. J., Antonopoulou, E., Stead, D. and Martin, S. A. M. (2017).** Postprandial hepatic protein expression in trout *Oncorhynchus mykiss* a proteomics examination. *Biochemistry and Biophysics Reports* **9**, 79-85.

**Table S2.** Core and most abundant (cumulative relative abundance per treatment >80%) operational taxonomic units (OTU) found in the gut *Oncorhynchus mykiss*. **Purple:** core and most abundant OTUs; **Red:** core OTUs; **Blue:** most abundant OTUs;  $\approx$ : tentative phylogenetic affiliation.

| OTU  | Closest relative                                  | Similarity (%) | GenBank accession No | Habitat of origin                                                          | Reference             | Closest genus (% similarity)     |
|------|---------------------------------------------------|----------------|----------------------|----------------------------------------------------------------------------|-----------------------|----------------------------------|
| 0001 | Clone TP-2 (Tenericutes)                          | 95.8           | DQ340193             | <i>Gillichthys mirabilis</i> (mudsucker, estuarine fish) gut               | Bano et al. (2007)    | <i>Mycoplasma</i> (92%)          |
| 0002 | TTGE gel band N123 ( $\approx$ Firmicutes)        | 100.0          | JN185158             | <i>Oncorhynchus mykiss</i> gut                                             | Unpublished           | <i>Acetanaerobacterium</i> (93%) |
| 0019 | Clone P-H6 (Bacillales)                           | 100.0          | HQ897587             | Atlantic salmon ( <i>Salmo salar</i> L.) intestine                         | Unpublished           | <i>Bacillus</i> (99%)            |
| 0027 | Clone A292_NCI                                    | 100.0          | FJ456668             | <i>Notothenia coriiceps</i> (Southern Ocean fish) intestinal content       | Ward et al. (2009)    | <i>Photobacterium</i> (100%)     |
| 0025 | Clone OTU250                                      | 100.0          | KC120615             | Farmed adult turbot ( <i>Scophthalmus maximus</i> ) gastrointestinal tract | Xing et al. (2013)    | <i>Vulcaniibacterium</i> (100%)  |
| 0031 | Clone WTB_O14                                     | 100.0          | EU009832             | Turkey cecum                                                               | Scupham et al. (2008) | <i>Lactobacillus</i> (100%)      |
| 0033 | Clone N4-2                                        | 100.0          | KM974899             | <i>Camponotus japonicus</i> (Japanese carpenter ant) gut                   | Unpublished           | <i>Moraxella</i> (100%)          |
| 0038 | <i>Lactobacillus salivarius</i> (Lactobacillales) | 100.0          | KR492877             | Chicken cloace                                                             | Unpublished           | <i>Lactobacillus</i> (100%)      |
| 0039 | Clone AcqueII_100 (Rhizobiales)                   | 100.0          | HF912305             | Process white water of a paper mill                                        | Unpublished           | <i>Microviriga</i> (98%)         |

|      |                                                                                   |       |          |                                                                      |                       |                                   |
|------|-----------------------------------------------------------------------------------|-------|----------|----------------------------------------------------------------------|-----------------------|-----------------------------------|
| 0047 | Cone P-H6<br>(Bacillales)                                                         | 100.0 | HQ897587 | Atlantic salmon ( <i>Salmo salar</i> ) intestine                     | Unpublished           | <i>Bacillus</i><br>(99%)          |
| 0058 | <i>Sphingobium yanoikuyae</i><br>(Sphingomonadales)                               | 100.0 | KM871866 | Puffer fish digestive gland                                          | Unpublished           | <i>Sphingobium</i><br>(100%)      |
| 0069 | <i>Lactobacillus delbrueckii</i> subsp.<br><i>bulgaricus</i><br>(Lactobacillales) | 100.0 | KJ729046 | <i>Labeo rohita</i> (rohu/roho labeo, river water<br>fish) intestine | Unpublished           | <i>Lactobacillus</i><br>(100%)    |
| 0078 | Clone Woods-Hole_a1939                                                            | 100.0 | KF799397 | <i>Ciona intestinalis</i> (sea squirt) gut                           | Dishaw et al. (2014)  | <i>Photobacterium</i><br>(99%)    |
| 0087 | <i>Weissella</i> sp.<br>(Lactobacillales)                                         | 100.0 | KM088091 | <i>Tenebrio molitor</i> (yellow mealworm beetle)<br>larvae guts      | Unpublished           | <i>Weissella</i><br>(100%)        |
| 0100 | Clone Comp5-2                                                                     | 100.0 | KF911273 | Cow manure composting                                                | Unpublished           | <i>Pseudoxanthomona</i><br>(100%) |
| 0003 | <i>Pseudomonas</i> sp.<br>(Pseudomonadales)                                       | 100.0 | KF366100 | <i>Danaus plexippus</i> (overwintering butterflies)<br>midgut        | Unpublished           | <i>Pseudomonas</i><br>(100%)      |
| 0004 | Clone 25                                                                          | 100.0 | DQ889971 | Juvenile Atlantic salmon ( <i>Salmo salar</i> )<br>digestive tract   | Navarrete et al. 2009 | <i>Chroocidiopsis</i><br>(90%)    |
| 0005 | <i>Cetobacterium somerae</i> 23<br>(Fusobacteriales)                              | 97.9  | HG326498 | <i>Siganus canaliculatus</i> (rabbitfish, coral reef)<br>gut         | Unpublished           | <i>Cetobacterium</i><br>(98%)     |
| 0006 | Bio-material L100                                                                 | 99.6  | HG966676 | <i>Pisum sativum</i> subsp. <i>elatius</i> (wild pea)<br>chloroplast | Unpublished           | <i>Photobacterium</i><br>(100%)   |

|      |                                                        |       |          |                                                                                                               |                                         |                                 |
|------|--------------------------------------------------------|-------|----------|---------------------------------------------------------------------------------------------------------------|-----------------------------------------|---------------------------------|
| 0007 | <i>Photobacterium phosphoreum</i><br>(Vibrionales)     | 100.0 | KU204883 | Host: <i>Salmo salar</i> (Atlantic salmon)                                                                    | Unpublished                             | <i>Photobacterium</i><br>(100%) |
| 0008 | <i>Weissella confuse</i><br>(Lactobacillales)          | 100.0 | LC127180 | Human faeces                                                                                                  | Unpublished                             | <i>Weissella</i><br>(100%)      |
| 0009 | Clone T-RFLP_clone_K44<br>(≈Tenericutes)               | 100.0 | KP780113 | Chicken caeca                                                                                                 | Witzig et al. (2015)                    | <i>Chroocidiopsis</i><br>(91%)  |
| 0010 | <i>Pseudomonas brenneri</i><br>(Pseudomonadales)       | 100.0 | KU750791 | Rhizosphere from <i>Lepidium meyenii</i> (maca)                                                               | Unpublished                             | <i>Pseudomonas</i><br>(100%)    |
| 0011 | Clone Sch1000_2                                        | 99.6  | HE586962 | Freshwater fish gut                                                                                           | Unpublished                             | <i>Lactobacillus</i><br>(100%)  |
| 0012 | Clone FecI096<br>(Lactobacillales)                     | 100.0 | KM244870 | Faecal matter of pigs under indoor system                                                                     | Unpublished                             | <i>Lactobacillus</i><br>(100%)  |
| 0013 | <i>Photobacterium phosphoreum</i><br>(Vibrionales)     | 100.0 | KJ817442 | Atlantic salmon ( <i>Salmo salar</i> ) faeces                                                                 | Hatje et al. (2014)                     | <i>Photobacterium</i><br>(100%) |
| 0014 | <i>Pseudomonas nitroreducens</i><br>(Pseudomonadales)  | 100.0 | JX987715 | Shrimp and crab farming pond water                                                                            | Unpublished                             | <i>Pseudomonas</i><br>(100%)    |
| 0015 | Clone OTU0162<br>(Pseudomonadales)                     | 100.0 | KM059059 | <i>Bactrocera minax</i> (Chinese citrus fly) gut and reproductive organ                                       | Wang et al. (2014)                      | <i>Pseudomonas</i><br>(100%)    |
| 0016 | <i>Plesiomonas shigelloides</i><br>(Enterobacteriales) | 100.0 | DQ822763 | Intestinal bacteria of freshwater salmon <i>Salmo salar</i> and sea trout <i>Salmo trutta trutta</i> and diet | Skrodenytė-Arbačiauskienė et al. (2008) | <i>Plesiomonas</i><br>(100%)    |

|      |                                                                             |       |           |                                                                  |                        |                                   |
|------|-----------------------------------------------------------------------------|-------|-----------|------------------------------------------------------------------|------------------------|-----------------------------------|
| 0017 | <i>Acinetobacter</i> sp.<br>(Pseudomonadales)                               | 100.0 | KU159259  | Wetland                                                          | Unpublished            | <i>Acinetobacter</i><br>(100%)    |
| 0018 | <i>Pseudomonas</i> sp.<br>(Pseudomonadales)                                 | 100.0 | KF366100  | Midgut of <i>Danaus plexippus</i><br>(overwintering butterflies) | Unpublished            | <i>Pseudomonas</i><br>(100%)      |
| 0021 | <i>Streptococcus equinus</i><br>(Lactobacillales)                           | 100.0 | LC145574  | Cow faces                                                        | Unpublished            | <i>Streptococcus</i><br>(100%)    |
| 0023 | <i>Herbaspirillum huttiense</i> subsp.<br><i>putei</i><br>(Burkholderiales) | 100.0 | NR_114068 | Well water                                                       | de Souza et al. (2013) | <i>Herbaspirillum</i><br>(100%)   |
| 0024 | <i>Bacillus</i> sp.<br>(Bacillales)                                         | 99.6  | KT751303  | Soil                                                             | Unpublished            | <i>Bacillus</i><br>(100%)         |
| 0030 | <i>Escherichia coli</i><br>(Enterobacteriales)                              | 100.0 | KT898132  | Host: swine                                                      | Unpublished            | <i>Escherichia</i><br>(100%)      |
| 0056 | <i>Pedobacter</i> sp.<br>(Sphingobacteriales)                               | 100.0 | KM187459  | <i>Pseudacris crucifer</i> (spring peeper, frog) skin            | Walke et al. (2015)    | <i>Pedobacter</i><br>(100%)       |
| 0063 | <i>Chryseobacterium pallidum</i><br>(Flavobacteriales)                      | 99.6  | KU362282  | Soil                                                             | Unpublished            | <i>Chryseobacterium</i><br>(100%) |

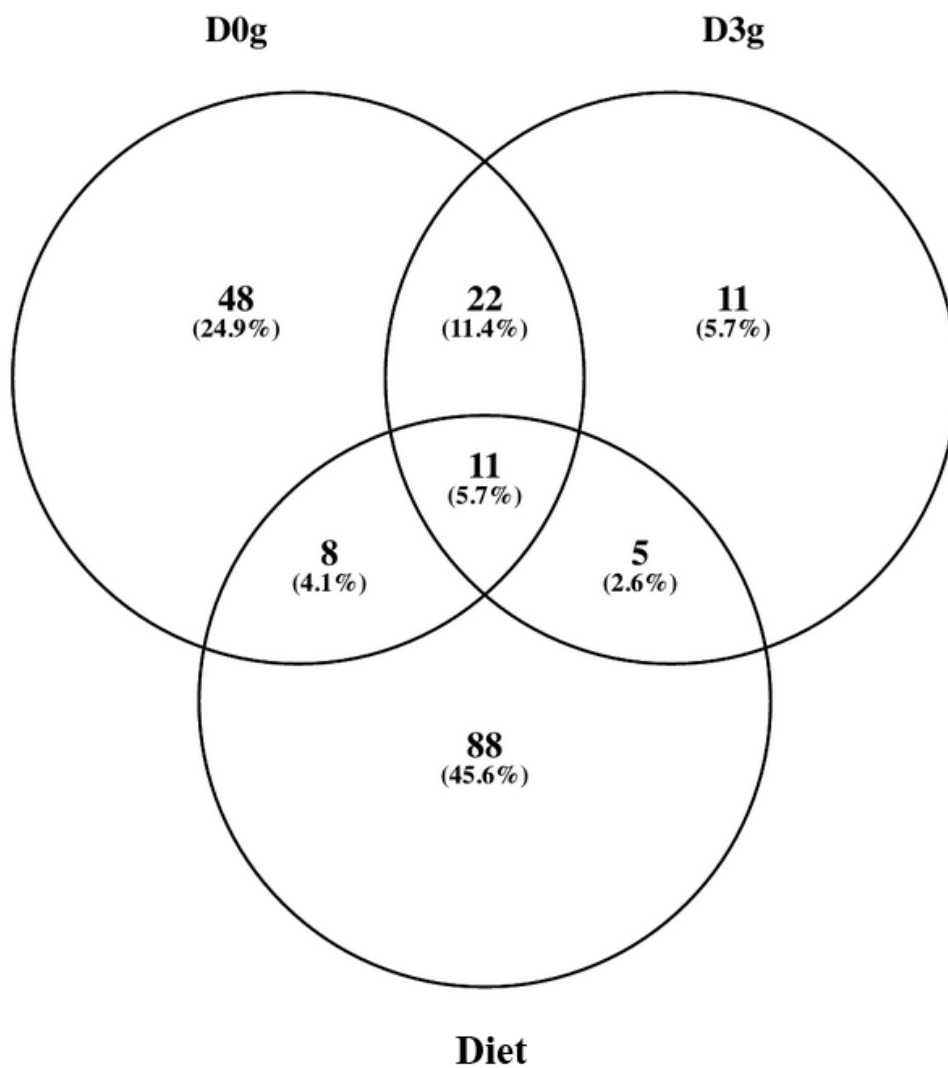

**Figure S1.** Shared operational taxonomic units (OTUs) between the diet D and the midgut (g) of reared *Oncorhynchus mykiss* before feeding at 0 h (D0g) and at 3 h (D3g) after feeding diet D.
